# Supplementary material for: Downregulation of Uncoupling Protein 2(UCP2) Mediated by MicroRNA-762 Confers Cardioprotection and Participates in the Regulation of Dynamic Mitochondrial Homeostasis of Dynamin Related Protein1 (DRP1) After Myocardial Infarction in Mice
Source: Frontiers journal article supplement (doi:10.3389/fcvm.2021.764064), 2022-02-24
Supplement: Data_Sheet_2.zip [file Data_Sheet_2.zip]

## Sheet: cardical Function
EF		sham					MI
	AAV-GFP	65.05	66.73	68.37	73.75	70.47	25.06	30.85	42.73	36.9	44.03
	AAV-UCP2	71.17	71.73	69.85	75.52	55.63	51.09	59.7	37.84	64.12	49.55
FS	AAV-GFP	48.5	40.63	41.62	49.13	35.27	17.66	22.14	13.07	19.72	30.9
	AAV-UCP2	48.42	41.56	39.04	32.06	41.93	36.44	23.05	23.97	37.96	27.32
IVSd	AAV-GFP	0.82	0.84	0.94	0.88	0.78	0.65	0.65	0.58	0.66	0.63
	AAV-UCP2	0.84	0.87	0.91	0.86	0.81	0.77	0.75	0.82	0.81	0.8
IVSs	AAV-GFP	1.3	1.37	1.44	1.43	1.28	0.59	0.95	0.98	0.72	0.7
	AAV-UCP2	1.29	1.31	1.42	1.37	1.38	1.23	1.14	0.92	1.24	1.14
LVIDd	AAV-GFP	2.57	3.19	2.72	2.52	3.13	6.08	4.29	3.73	4.43	5.87
	AAV-UCP2	3.05	2.52	3.45	3.03	3.42	3.11	3.34	3.87	3.22	4.29
LVIDs	AAV-GFP	1.63	1.96	1.64	1.1	2.08	4.24	3.39	3.91	3.6	3.73
	AAV-UCP2	1.87	2.13	1.8	1.73	1.82	2.31	3.13	2.45	2.2	2.43
LVPWd	AAV-GFP	1.1	1.1	0.98	0.83	0.94	0.51	0.69	0.62	0.51	0.79
	AAV-UCP2	1	1.19	1.1	0.82	0.94	0.97	0.8	0.84	0.95	0.87
LVPWs	AAV-GFP	1.31	1.27	1.26	1.23	1.24	0.67	0.72	0.81	0.82	0.87
	AAV-UCP2	1.38	1.23	1.39	0.92	1.28	1.18	1.13	0.99	0.88	1.14
