# Supplementary material for: Downregulation of Uncoupling Protein 2(UCP2) Mediated by MicroRNA-762 Confers Cardioprotection and Participates in the Regulation of Dynamic Mitochondrial Homeostasis of Dynamin Related Protein1 (DRP1) After Myocardial Infarction in Mice
Source: Frontiers journal article supplement (doi:10.3389/fcvm.2021.764064), 2022-02-24
Supplement: Data_Sheet_3.zip [file Data_Sheet_3.zip]

## Sheet: Sheet1
						666.667
	AAV-GFP	Sham	689	432	879	1.0335	0.648	1.3185
		MI	2312	1567	1437	3.468	2.3505	2.1555
	AAV-UCP2	Sham	643	567	678	0.9645	0.8505	1.017					1.0335	0.648	1.3185	3.468	2.3505	2.1555
		MI	1045	1137	769	1.5675	1.7055	1.1535					0.9645	0.8505	1.017	1.5675	1.7055	1.1535
