# Supplementary material for: Downregulation of Uncoupling Protein 2(UCP2) Mediated by MicroRNA-762 Confers Cardioprotection and Participates in the Regulation of Dynamic Mitochondrial Homeostasis of Dynamin Related Protein1 (DRP1) After Myocardial Infarction in Mice
Source: Frontiers journal article supplement (doi:10.3389/fcvm.2021.764064), 2022-02-24
Supplement: Data_Sheet_6.zip [file Data_Sheet_6.zip]

## Sheet: Sheet1
					Hypoxia									Fluorescence intensity
	AdLacZ		AdlacZ+H		lacZ+mdivi		Ad-UCP2+mdivi		AdUCP2		AdUCP2+H				AdLacZ	AdlacZ+H	lacZ+mdivi	Ad-UCP2+mdivi	AdUCP2	AdUCP2+H
	Area	IOD	Area	IOD	Area	IOD	Area	IOD	Area	IOD	Area	IOD
1	145013	937959	199548	1276961	119064	901808	127483	670000	163550	726444	122407	1133312		1	6.4681	6.39927	7.57414	5.2556	4.44172	9.25856
2	159605	950330	186667	1612860	181794	1336308	136473	779902	137361	810101	150417	986664		2	5.95426	8.64031	7.35067	5.7147	5.89761	6.55952
3	188804	730320	106675	1491820	191055	937345	134928	780101	152366	899899	143316	995967		3	3.86814	13.9847	4.90615	5.78161	5.90617	6.94945
4	159505	1023330	176566	1792860	162064	1036355	140293	780101	119361	826449	115062	1031391		4	6.41566	10.1541	6.39473	5.56051	6.92395	8.96378
5	153098	885868	95625	1037341	113692	437265	148203	780101	153504	1181788	136943	1106866		5	5.78628	10.848	3.84605	5.26373	7.69874	8.08268
6	139299	832322	107025	1703811	153565	556195	149203	845456	127459	1246265	142226	1106866		6	5.97508	15.9197	3.62189	5.66648	9.77777	7.78244
7	159669	1023332	189596	967452	151965	960593	138293	900101	173724	826445	143316	1006866		7	6.40908	5.1027	6.32115	6.50865	4.75723	7.0255
8	156795	1005876	175666	1967466	128784	710899	140293	900101	153499	826445	133316	986664		8	6.41523	11.2	5.52009	6.41587	5.38404	7.40094
														5.91148	AdLacZ	AdlacZ+H	lacZ+mdivi	Ad-UCP2+mdivi	AdUCP2	AdUCP2+H
														1	1.09416	1.08252	1.28126	0.88905	0.751373	1.5662							1.10244	2.12164	1.59502
														2	1.00724	1.46161	1.24346	0.966712	0.997653	1.10962							1.48851	2.62555	1.13005
														3	0.654344	2.36569	0.829937	0.978031	0.999101	1.17559							2.40923	3.03891	1.19722
														4	1.08529	1.71768	1.08175	0.94063	1.17127	1.51634							1.7493	2.92269	1.54424
														5	0.978821	1.83508	0.650607	0.890426	1.30234	1.36728							1.86885	2.65046	1.39245
														6	1.01076	2.69302	0.612687	0.958556	1.65403	1.3165							2.74259	2.59269	1.34073
														7	1.08418	0.863185	1.0693	1.10102	0.804744	1.18845							0.879072	2.8653	1.21032
														8	1.08522	1.89463	0.933791	1.08532	0.910777	1.25196							1.92949	1.71928	1.275
