# Supplementary material for: Downregulation of Uncoupling Protein 2(UCP2) Mediated by MicroRNA-762 Confers Cardioprotection and Participates in the Regulation of Dynamic Mitochondrial Homeostasis of Dynamin Related Protein1 (DRP1) After Myocardial Infarction in Mice
Source: Frontiers journal article supplement (doi:10.3389/fcvm.2021.764064), 2022-02-24
Supplement: Data_Sheet_8.zip [file Data_Sheet_8.zip]

## Sheet: Sheet1
Cell viability(%)
	miR-762+Control						miR-762+UCP2
Normoxia	92	97	97	91	96	99	93	90	94	96	93	88
Hypoxia	38	36	38	40	35	33	93	98	92	97	98	96
LDH(U/L)
Normoxia	24	27	29	20	26	24	25	23	27	20	22	30
Hypoxia	360	374	369	391	383	372	34	25	26	29	34	26
							25 23 27 20 22 30
